# Supplementary material for: Evaluation and comparison of N-cycloalkylformylated chitosan bis(arylcarbamate)s as chiral selectors for enantioseparation
Source: Royal Society of Chemistry journal article supplement (doi:10.1039/c7nj01611e), 2017-01-01
Supplement: c7nj01611e1.pdf [file c7nj01611e1.pdf]

## Electronic Supplementary Information

*for*

### **Evaluation and comparison of *N*-cycloalkylformylated chitosan bis(arylcarbamate)s as chiral selectors for enantioseparation**

*Zheng-Wu Bai,<sup>a</sup> Fei Yang,<sup>a</sup> Ke-Qin Fu,<sup>a</sup> Xiao-Chen Wang,<sup>a</sup> Jian-De Liu,<sup>a</sup> Wei Chen,<sup>a</sup>*

*Shao-Hua Huang<sup>b</sup> and Sheng Tang<sup>\*a</sup>*

*<sup>a</sup>School of Chemistry and Environmental Engineering, Wuhan Institute of Technology,  
Wuhan 430073, China.*

*<sup>b</sup>Key Laboratory of Biobased Materials, Qingdao Institute of Bioenergy and Bioprocess  
Technology, Chinese Academy of Sciences, Qingdao 266101, China.*

\*Corresponding author: Sheng Tang (S. Tang)

E-mail Address: [stang@wit.edu.cn](mailto:stang@wit.edu.cn)

Tel. and fax: +86 27 87195680

## **Table of Contents**

1.  $^1\text{H}$  NMR spectra of **CSs2–4**
2. Structures of the tested nineteen racemates
3. Numbers of the racemates recognized and baseline separated by **CSPs1–4**
4. Enantioseparation results of **CSPs1–4**

# 1. <sup>1</sup>H NMR spectra of CSs2-4

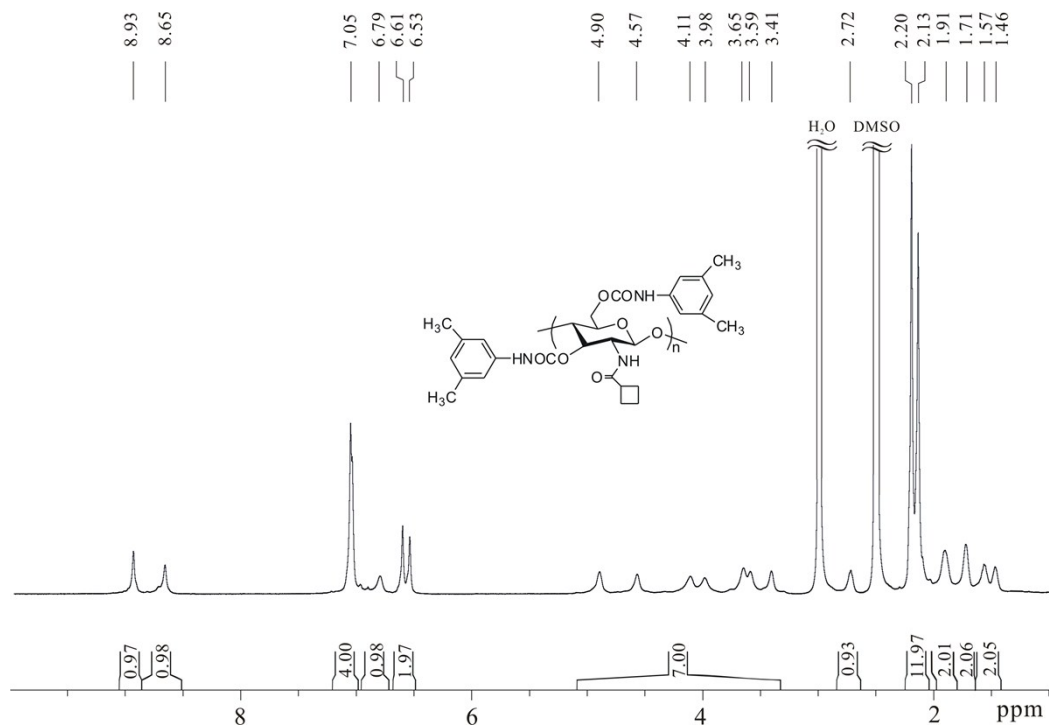

**Fig. S1** <sup>1</sup>H NMR spectrum of chitosan bis(3,5-dimethylphenylcarbamate)-(N-cyclobutylformamide) (CS2) (600 MHz, DMSO-*d*<sub>6</sub>, 90 °C)

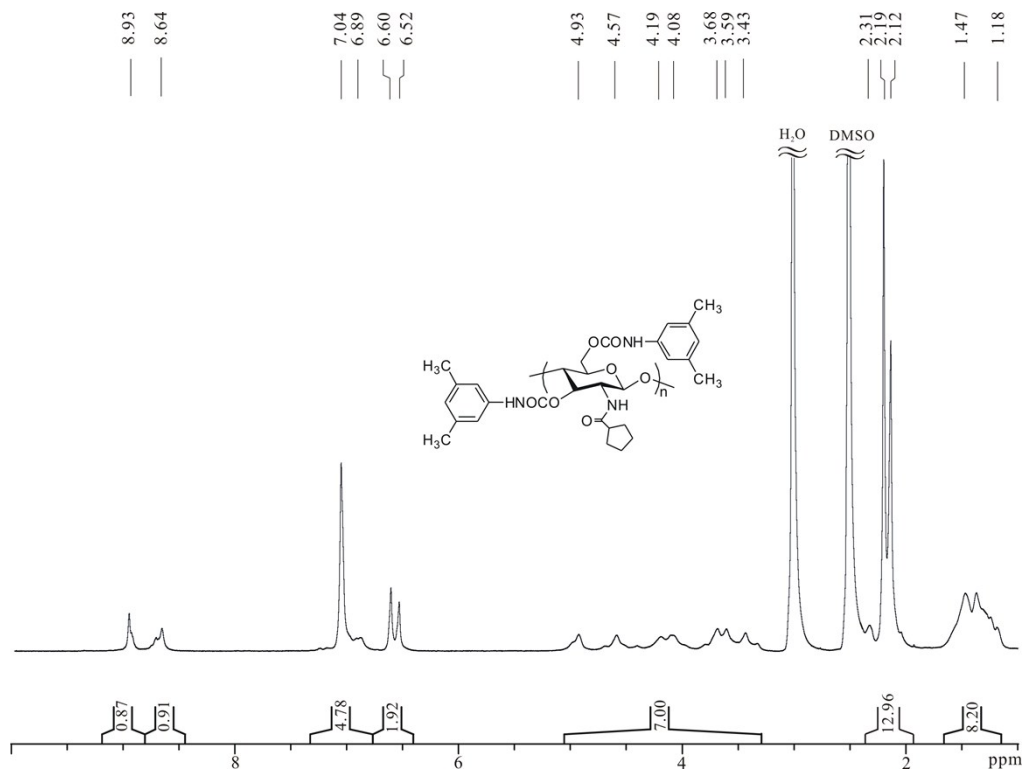

**Fig. S2**  $^1\text{H}$  NMR spectrum of chitosan bis(3,5-dimethylphenylcarbamate)-(N-cyclopentylformamide) (CS3) (600 MHz,  $\text{DMSO-}d_6$ , 90 °C)

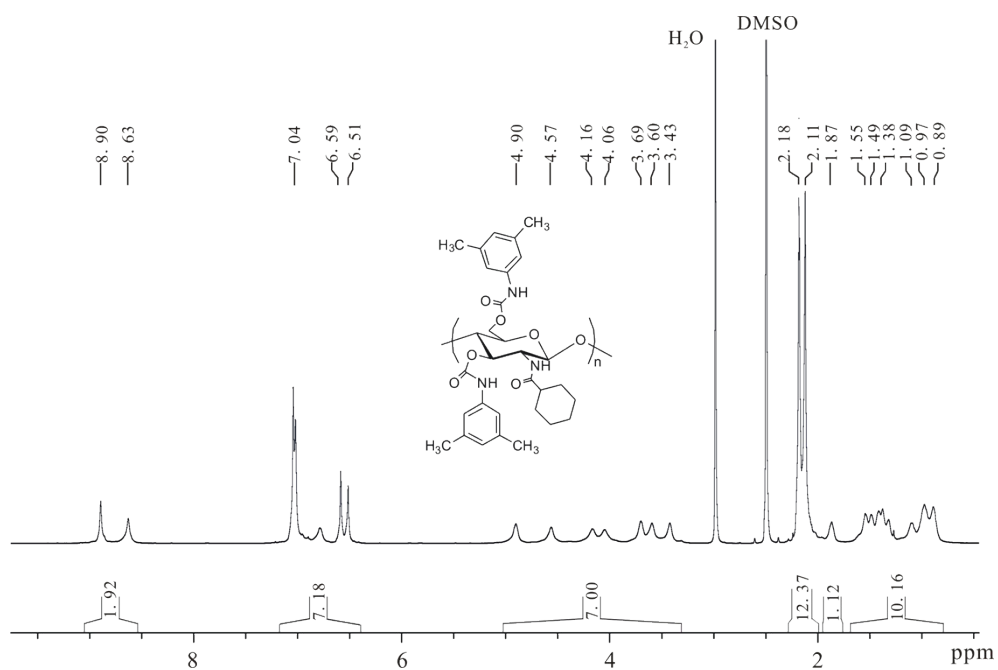

**Fig. S3**  $^1\text{H}$  NMR spectrum of chitosan bis(3,5-dimethylphenylcarbamate)-(N-cyclohexylformamide) (CS4) (600 MHz,  $\text{DMSO-}d_6$ , 90 °C)

## 2. Structures of the tested nineteen racemates

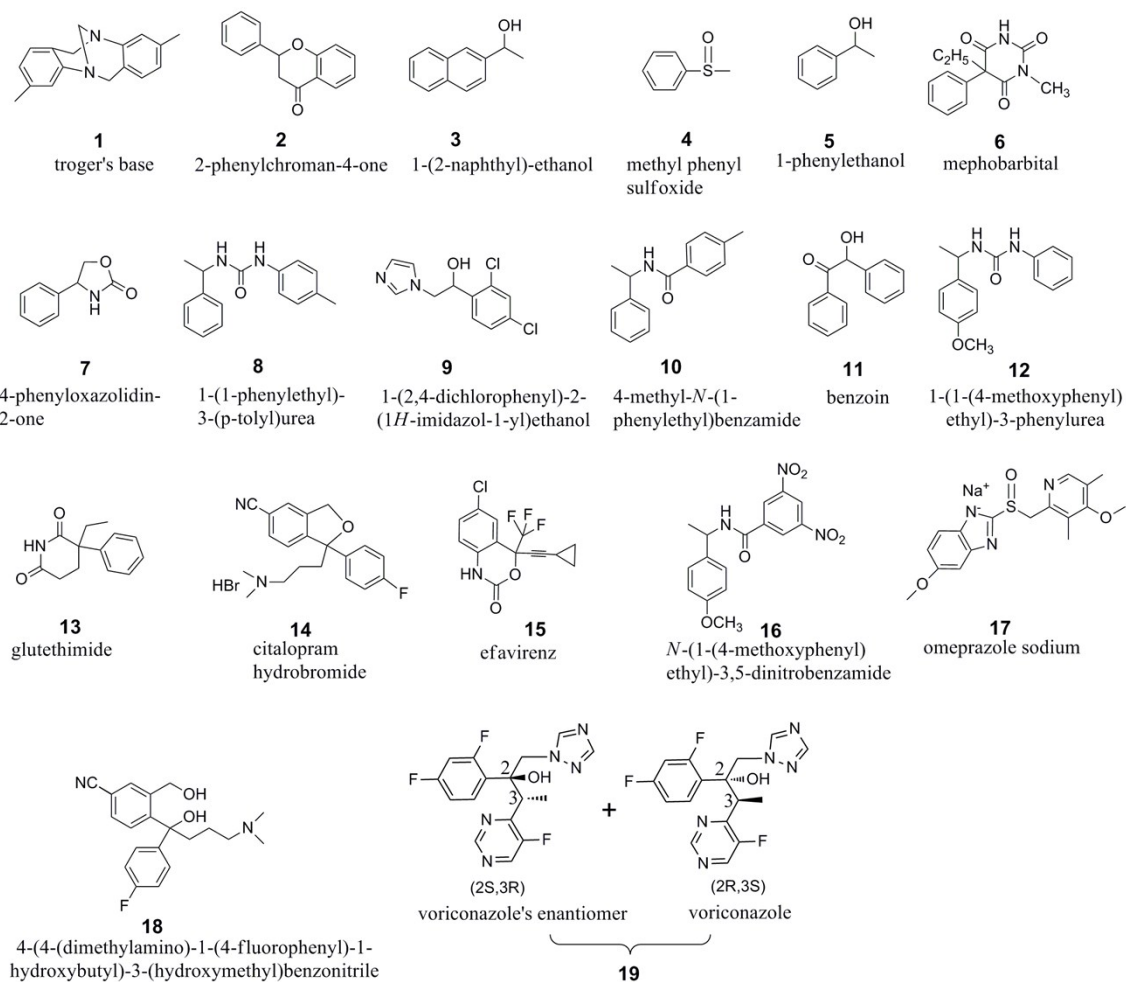

**Fig. S4** Structures of the tested nineteen racemates.

### 3. Numbers of the racemates recognized and baseline separated by CSPs1–4

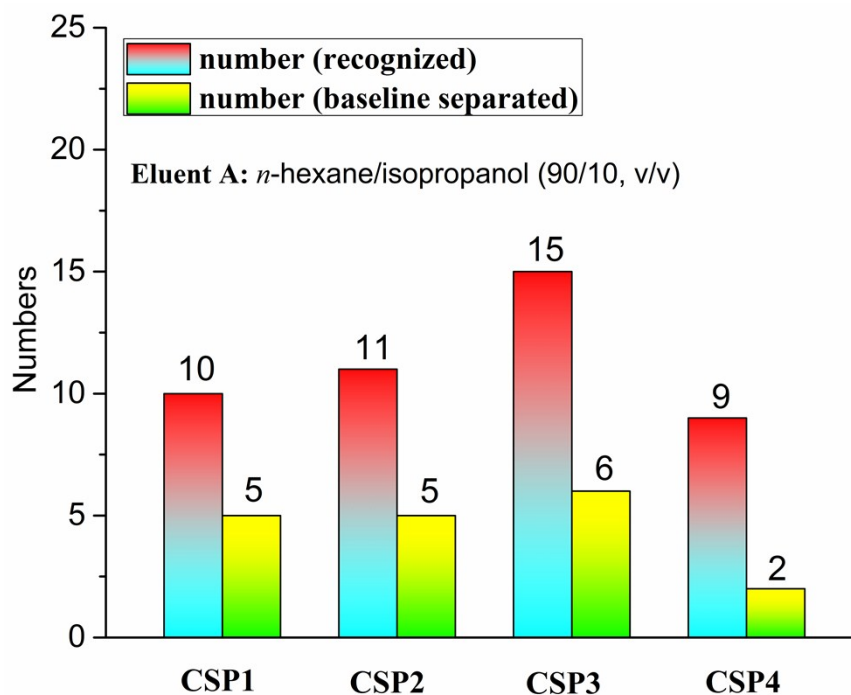

Fig. S5 Numbers of the racemates recognized and baseline separated by CSPs1–4 in eluent A

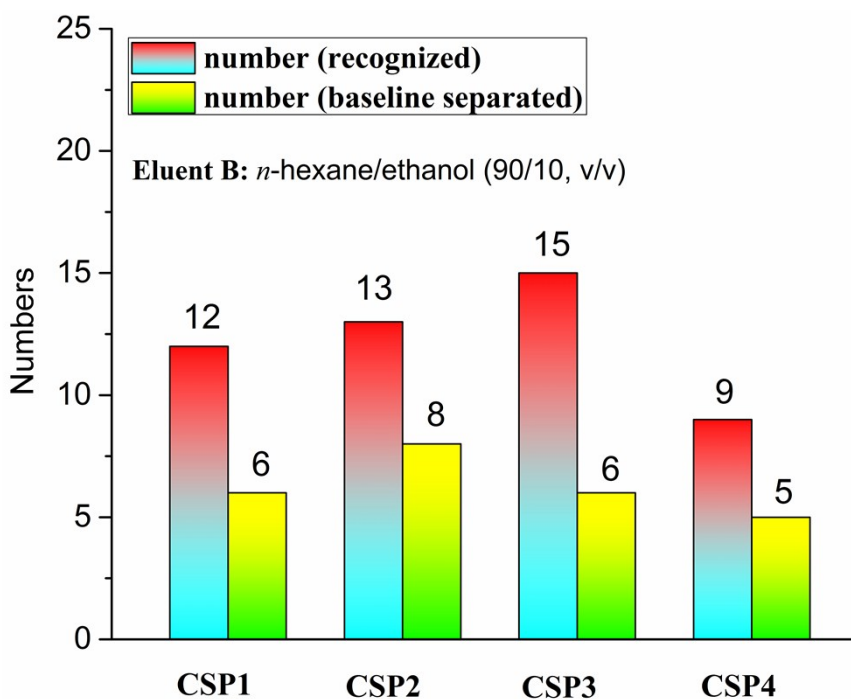

Fig. S6 Numbers of the racemates recognized and baseline separated by CSPs1–4 in eluent B.

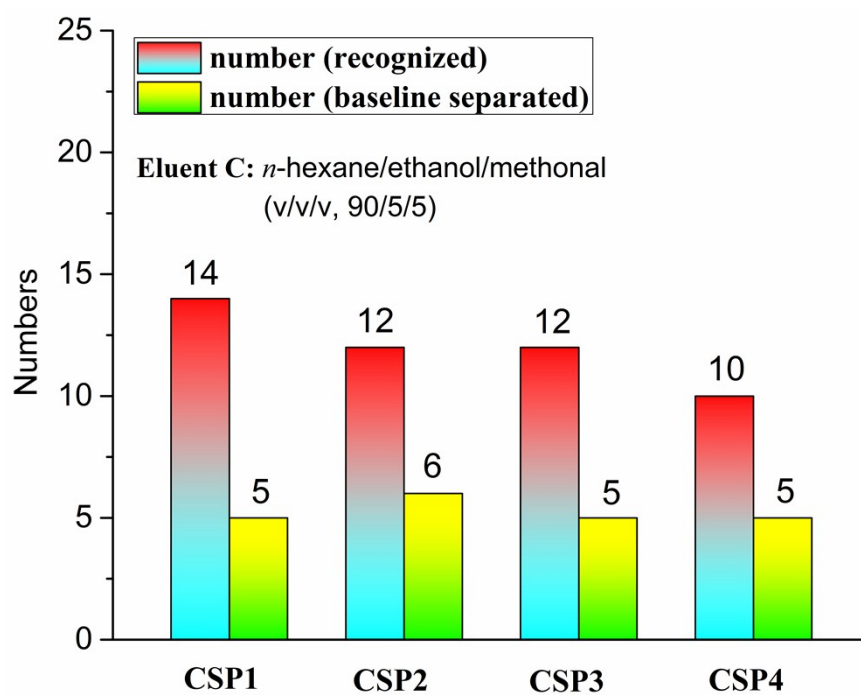

**Fig. S7** Numbers of the racemates recognized and baseline separated by **CSPs1–4** in eluent C.

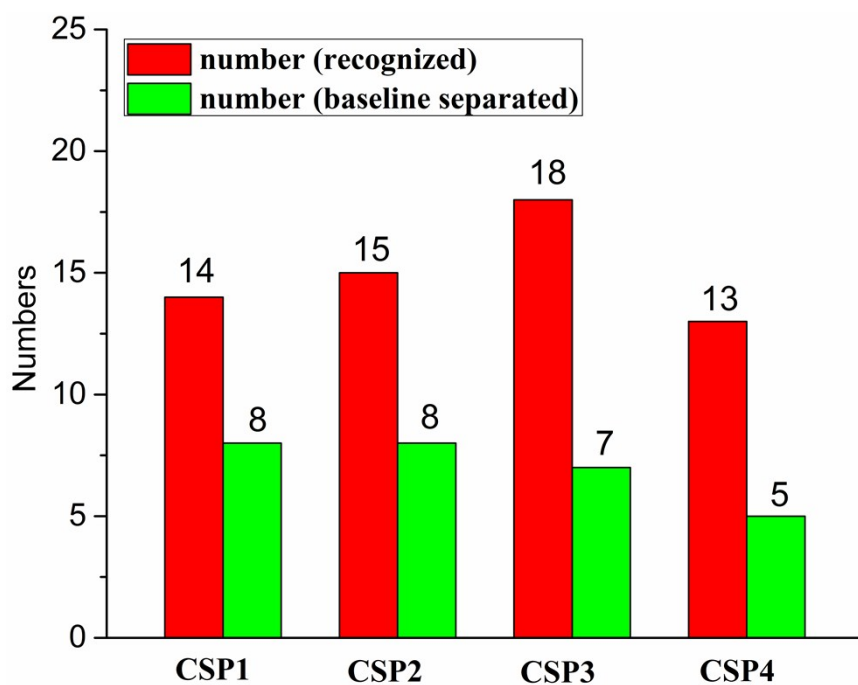

**Fig. S8** Total numbers of the racemates recognized and baseline separated by **CSPs1–4** in eluents A, B and C.

#### 4. Enantioseparation results of CSPs1–4

**Table S1** Enantioseparation results of CSPs1–4

| S.N.     | CSP1               |          |       | CSP2               |          |       | CSP3               |          |       | CSP4              |          |       | Eluent   |
|----------|--------------------|----------|-------|--------------------|----------|-------|--------------------|----------|-------|-------------------|----------|-------|----------|
|          | $k_1$              | $\alpha$ | $R_s$ | $k_1$              | $\alpha$ | $R_s$ | $k_1$              | $\alpha$ | $R_s$ | $k_1$             | $\alpha$ | $R_s$ |          |
| <b>1</b> | 0.32               | 1.00     | 0.00  | 0.27               | 1.00     | 0.00  | 0.33 <sup>-</sup>  | 1.21     | 1.00  | 0.30              | 1.00     | 0.00  | <b>A</b> |
|          | 0.27 <sup>-</sup>  | 1.14     | 0.43  | 0.22               | 1.00     | 0.00  | 0.26 <sup>-</sup>  | 1.25     | 1.09  | 0.23              | 1.00     | 0.00  | <b>B</b> |
|          | 0.31 <sup>-</sup>  | 1.15     | 0.55  | 0.22               | 1.00     | 0.00  | 0.29 <sup>-</sup>  | 1.25     | 1.20  | 0.23              | 1.00     | 0.00  | <b>C</b> |
| <b>2</b> | 1.23 <sup>-</sup>  | 1.74     | 6.56  | 1.21 <sup>-</sup>  | 1.57     | 4.02  | 1.40 <sup>-</sup>  | 1.47     | 4.53  | 0.97 <sup>-</sup> | 1.43     | 2.88  | <b>A</b> |
|          | 1.03 <sup>-</sup>  | 1.78     | 6.17  | 0.90 <sup>-</sup>  | 1.55     | 3.99  | 1.02 <sup>-</sup>  | 1.43     | 4.28  | 0.70 <sup>-</sup> | 1.34     | 2.37  | <b>B</b> |
|          | 1.14 <sup>-</sup>  | 1.75     | 7.60  | 0.96 <sup>-</sup>  | 1.48     | 3.70  | 1.11 <sup>-</sup>  | 1.40     | 4.24  | 0.70 <sup>-</sup> | 1.37     | 2.40  | <b>C</b> |
| <b>3</b> | 1.34               | 1.00     | 0.00  | 1.20               | 1.00     | 0.00  | 1.49               | 1.00     | 0.00  | 1.30              | 1.00     | 0.00  | <b>A</b> |
|          | 0.77               | 1.00     | 0.00  | 0.71               | 1.00     | 0.00  | 0.87 <sup>-</sup>  | 1.07     | 0.19  | 0.71              | 1.00     | 0.00  | <b>B</b> |
|          | 0.83               | 1.00     | 0.00  | 0.66               | 1.00     | 0.00  | 0.81 <sup>-</sup>  | 1.05     | 0.11  | 0.69              | 1.00     | 0.00  | <b>C</b> |
| <b>4</b> | 2.46 <sup>+</sup>  | 1.04     | 0.23  | 3.12 <sup>+</sup>  | 1.10     | 0.95  | 3.09 <sup>+</sup>  | 1.25     | 1.02  | 2.99              | 1.00     | 0.00  | <b>A</b> |
|          | 1.50 <sup>+</sup>  | 1.04     | 0.19  | 1.63 <sup>+</sup>  | 1.11     | 1.13  | 1.80 <sup>+</sup>  | 1.05     | 0.30  | 1.53              | 1.00     | 0.00  | <b>B</b> |
|          | 1.75 <sup>+</sup>  | 1.07     | 0.83  | 1.30 <sup>+</sup>  | 1.09     | 0.87  | 1.68               | 1.00     | 0.00  | 1.32              | 1.00     | 0.00  | <b>C</b> |
| <b>5</b> | 0.81               | 1.00     | 0.00  | 0.42               | 1.00     | 0.00  | 0.81 <sup>-</sup>  | 1.11     | 0.87  | 0.65 <sup>-</sup> | 1.11     | 0.24  | <b>A</b> |
|          | 0.50               | 1.00     | 0.00  | 0.39               | 1.00     | 0.00  | 0.58 <sup>-</sup>  | 1.06     | 0.10  | 0.51              | 1.00     | 0.00  | <b>B</b> |
|          | 0.53               | 1.00     | 0.00  | 0.40               | 1.00     | 0.00  | 0.61               | 1.00     | 0.00  | 0.51              | 1.00     | 0.00  | <b>C</b> |
| <b>6</b> | 2.94               | 1.73     | 3.84  | 5.70               | 1.38     | 1.33  | 2.98               | 1.77     | 3.02  | 6.01              | 1.20     | 0.34  | <b>A</b> |
|          | 2.12               | 1.45     | 3.35  | 3.19               | 1.40     | 2.73  | 2.37               | 1.48     | 2.92  | 2.86              | 1.17     | 0.85  | <b>B</b> |
|          | 2.19               | 1.44     | 3.36  | 2.58               | 1.42     | 3.36  | 2.23               | 1.44     | 4.01  | 2.44              | 1.11     | 0.48  | <b>C</b> |
| <b>7</b> | 12.75 <sup>R</sup> | 1.15     | 1.27  | 12.93 <sup>R</sup> | 1.37     | 1.85  | 12.93 <sup>S</sup> | 1.35     | 2.46  | 11.51             | 1.00     | 0.00  | <b>A</b> |
|          | 6.43 <sup>R</sup>  | 1.48     | 4.14  | 6.63 <sup>R</sup>  | 1.41     | 2.98  | 6.99 <sup>R</sup>  | 1.33     | 3.10  | 5.16 <sup>R</sup> | 1.09     | 0.42  | <b>B</b> |
|          | 5.51 <sup>R</sup>  | 1.44     | 4.21  | 4.80 <sup>R</sup>  | 1.29     | 3.18  | 5.51 <sup>R</sup>  | 1.23     | 2.86  | 4.30 <sup>R</sup> | 1.09     | 0.88  | <b>C</b> |

Table S1 to be continued



Continued from Table S1

| S.N.      | CSP1               |          |       | CSP2               |          |       | CSP3               |          |       | CSP4              |          |       | Eluent   |
|-----------|--------------------|----------|-------|--------------------|----------|-------|--------------------|----------|-------|-------------------|----------|-------|----------|
|           | $k_1$              | $\alpha$ | $R_s$ | $k_1$              | $\alpha$ | $R_s$ | $k_1$              | $\alpha$ | $R_s$ | $k_1$             | $\alpha$ | $R_s$ |          |
| <b>8</b>  | 5.84               | 1.00     | 0.00  | 4.05 <sup>S</sup>  | 1.21     | 0.82  | 4.06 <sup>S</sup>  | 1.38     | 0.81  | 6.39              | 1.00     | 0.00  | <b>A</b> |
|           | 1.34               | 1.00     | 0.00  | 1.16 <sup>S</sup>  | 1.10     | 0.50  | 1.31 <sup>S</sup>  | 1.15     | 0.38  | 1.14              | 1.00     | 0.00  | <b>B</b> |
|           | 1.18               | 1.00     | 0.00  | 0.89               | 1.00     | 0.00  | 1.09               | 1.00     | 0.00  | 0.98              | 1.00     | 0.00  | <b>C</b> |
| <b>9</b>  | 3.59 <sup>+</sup>  | 1.83     | 2.80  | 3.78 <sup>+</sup>  | 1.76     | 3.27  | 3.90 <sup>+</sup>  | 1.58     | 3.16  | 3.59 <sup>+</sup> | 1.51     | 1.75  | <b>A</b> |
|           | 1.39 <sup>+</sup>  | 1.51     | 2.92  | 1.58 <sup>+</sup>  | 1.48     | 2.83  | 1.80 <sup>+</sup>  | 1.39     | 2.36  | 1.39 <sup>+</sup> | 1.45     | 1.90  | <b>B</b> |
|           | 1.45 <sup>+</sup>  | 1.30     | 1.28  | 1.30 <sup>+</sup>  | 1.32     | 2.14  | 1.55 <sup>+</sup>  | 1.15     | 1.16  | 1.35 <sup>+</sup> | 1.48     | 2.54  | <b>C</b> |
| <b>10</b> | 2.31               | 1.00     | 0.00  | 1.88               | 1.00     | 0.00  | 1.91 <sup>R</sup>  | 1.12     | 0.16  | 1.94              | 1.00     | 0.00  | <b>A</b> |
|           | 0.80               | 1.00     | 0.00  | 0.75               | 1.00     | 0.00  | 0.81 <sup>S</sup>  | 1.10     | 0.10  | 0.70              | 1.00     | 0.00  | <b>B</b> |
|           | 0.77               | 1.00     | 0.00  | 0.66               | 1.00     | 0.00  | 0.78               | 1.00     | 0.00  | 0.67              | 1.00     | 0.00  | <b>C</b> |
| <b>11</b> | 2.46 <sup>-</sup>  | 1.19     | 2.79  | 2.50 <sup>-</sup>  | 1.19     | 1.52  | 2.77 <sup>-</sup>  | 1.26     | 2.71  | 2.50 <sup>-</sup> | 1.13     | 1.10  | <b>A</b> |
|           | 1.63 <sup>-</sup>  | 1.29     | 2.05  | 1.56 <sup>-</sup>  | 1.26     | 2.15  | 1.91 <sup>-</sup>  | 2.45     | 3.33  | 1.48 <sup>-</sup> | 1.36     | 3.06  | <b>B</b> |
|           | 1.84 <sup>-</sup>  | 1.13     | 1.08  | 1.45 <sup>-</sup>  | 1.17     | 1.16  | 1.77 <sup>-</sup>  | 1.27     | 3.87  | 1.46 <sup>-</sup> | 1.40     | 3.57  | <b>C</b> |
| <b>12</b> | 6.16 <sup>S</sup>  | 1.33     | 1.46  | 6.49 <sup>S</sup>  | 1.37     | 1.65  | 6.59 <sup>S</sup>  | 1.44     | 1.70  | 8.52 <sup>S</sup> | 1.04     | 0.10  | <b>A</b> |
|           | 1.75 <sup>S</sup>  | 1.25     | 0.77  | 1.77 <sup>S</sup>  | 1.25     | 1.50  | 1.87 <sup>S</sup>  | 1.28     | 1.30  | 1.52              | 1.00     | 0.00  | <b>B</b> |
|           | 2.18 <sup>S</sup>  | 1.24     | 0.78  | 1.33 <sup>S</sup>  | 1.09     | 0.60  | 1.53 <sup>S</sup>  | 1.10     | 1.09  | 1.36              | 1.00     | 0.00  | <b>C</b> |
| <b>13</b> | -                  | -        | -     | -                  | -        | -     | -                  | -        | -     | -                 | -        | -     | <b>A</b> |
|           | 13.44 <sup>+</sup> | 1.14     | 1.29  | 15.51 <sup>+</sup> | 1.21     | 1.94  | 17.83 <sup>+</sup> | 1.12     | 1.23  | 12.06             | 1.00     | 0.00  | <b>B</b> |
|           | 10.33 <sup>+</sup> | 1.16     | 1.67  | 10.29 <sup>+</sup> | 1.16     | 1.96  | 13.59 <sup>+</sup> | 1.09     | 1.09  | 9.12              | 1.00     | 0.00  | <b>C</b> |
| <b>14</b> | 1.28 <sup>S</sup>  | 1.48     | 2.08  | 1.18 <sup>S</sup>  | 1.27     | 0.93  | 1.45 <sup>S</sup>  | 1.27     | 0.23  | 0.98 <sup>S</sup> | 1.24     | 0.18  | <b>A</b> |
|           | 0.84 <sup>S</sup>  | 1.28     | 1.36  | 0.77 <sup>S</sup>  | 1.20     | 0.87  | 1.04 <sup>S</sup>  | 1.26     | 0.11  | 0.68 <sup>S</sup> | 1.20     | 0.26  | <b>B</b> |
|           | 0.97 <sup>S</sup>  | 1.28     | 1.43  | 0.76 <sup>S</sup>  | 1.17     | 0.88  | 0.98 <sup>S</sup>  | 1.20     | 0.39  | 0.70 <sup>S</sup> | 1.22     | 0.93  | <b>C</b> |

Table S1 to be continued

Continued from Table S1

| S.N.      | CSP1                   |          |       | CSP2                   |          |       | CSP3                   |          |       | CSP4                   |          |       | Eluent   |
|-----------|------------------------|----------|-------|------------------------|----------|-------|------------------------|----------|-------|------------------------|----------|-------|----------|
|           | $k_1$                  | $\alpha$ | $R_s$ |          |
| <b>15</b> | 2.31 <sup>S</sup>      | 1.09     | 0.22  | 2.32 <sup>S</sup>      | 1.09     | 0.63  | 2.23 <sup>S</sup>      | 1.16     | 1.20  | 2.37 <sup>S</sup>      | 1.14     | 0.85  | <b>A</b> |
|           | 1.32                   | 1.00     | 0.00  | 1.38                   | 1.00     | 0.00  | 1.42                   | 1.00     | 0.00  | 1.19                   | 1.00     | 0.00  | <b>B</b> |
|           | 1.29 <sup>R</sup>      | 1.12     | 1.08  | 1.19                   | 1.00     | 0.00  | 1.29                   | 1.00     | 0.00  | 1.14                   | 1.00     | 0.00  | <b>C</b> |
| <b>16</b> | -                      | -        | -     | -                      | -        | -     | -                      | -        | -     | -                      | -        | -     | <b>A</b> |
|           | 26.14                  | 1.00     | 0.00  | 19.67 <sup>S</sup>     | 1.18     | 1.23  | 21.79                  | 1.00     | 0.00  | 15.10 <sup>R</sup>     | 1.40     | 2.49  | <b>B</b> |
|           | 22.05 <sup>S</sup>     | 1.07     | 0.40  | 17.15 <sup>S</sup>     | 1.07     | 0.63  | 22.38                  | 1.00     | 0.00  | 15.30 <sup>R</sup>     | 1.36     | 2.96  | <b>C</b> |
| <b>17</b> | 16.76                  | 1.00     | 0.00  | 14.78                  | 1.00     | 0.00  | 13.23 <sup>S</sup>     | 1.11     | 0.22  | -                      | -        | -     | <b>A</b> |
|           | 5.75                   | 1.00     | 0.00  | 6.55                   | 1.00     | 0.00  | 5.74                   | 1.00     | 0.00  | 4.82 <sup>S</sup>      | 1.09     | 0.19  | <b>B</b> |
|           | 4.47                   | 1.00     | 0.00  | 4.33 <sup>R</sup>      | 1.12     | 0.83  | 4.24                   | 1.00     | 0.00  | 3.66 <sup>R</sup>      | 1.16     | 1.03  | <b>C</b> |
| <b>18</b> | 4.13 <sup>S</sup>      | 1.28     | 1.05  | 3.23 <sup>S</sup>      | 1.17     | 0.62  | 4.03 <sup>S</sup>      | 1.04     | 0.10  | 2.68 <sup>S</sup>      | 1.29     | 0.21  | <b>A</b> |
|           | 1.49 <sup>S</sup>      | 1.20     | 0.98  | 1.62 <sup>S</sup>      | 1.04     | 0.26  | 1.81                   | 1.00     | 0.00  | 1.44                   | 1.00     | 0.00  | <b>B</b> |
|           | 1.71 <sup>S</sup>      | 1.22     | 1.17  | 1.43                   | 1.00     | 0.00  | 1.70 <sup>S</sup>      | 1.03     | 0.10  | 1.25 <sup>R</sup>      | 1.07     | 0.12  | <b>C</b> |
| <b>19</b> | -                      | -        | -     | 9.42                   | 1.00     | 0.00  | -                      | -        | -     | -                      | -        | -     | <b>A</b> |
|           | 3.37 <sup>2R, 3S</sup> | 4.12     | 10.36 | 3.24 <sup>2R, 3S</sup> | 8.64     | 12.28 | 3.65 <sup>2R, 3S</sup> | 5.25     | 10.92 | 2.61 <sup>2R, 3S</sup> | 3.68     | 7.15  | <b>B</b> |
|           | 2.51 <sup>2R, 3S</sup> | 2.80     | 8.29  | 2.19 <sup>2R, 3S</sup> | 5.38     | 12.95 | 2.62 <sup>2R, 3S</sup> | 3.61     | 10.52 | 1.93 <sup>2R, 3S</sup> | 2.14     | 5.09  | <b>C</b> |

S.N.: serial number of the racemates. Eluents: A: *n*-hexane/isopropanol (90/10, v/v), B: *n*-hexane/ethanol (90/10, v/v), and C: *n*-hexane/ethanol/methanol (90/5/5, v/v/v); flow rate: 1.0 ml min<sup>-1</sup>; detection temperature: 25 °C. “-” means that the racemate was retained too long, hence the data were unavailable. “+”, “-”, “R”, “S” and “(2R, 3S)” at the superscript of  $k_1$  refer to the optical rotation or configuration of the first-eluted enantiomer. Enantioseparation results of CSP2 were cited from our previously reported work.<sup>1</sup>

## References

1. J. Zhang, X. C. Wang, W. Chen and Z. W. Bai, *Analyst*, 2016, **141**, 4470-4480.
